# Supplementary material for: Adipose tissue NAPE-PLD controls fat mass development by altering the browning process and gut microbiota
Source: PubMed Central journal article supplement (PMC4382707; doi:10.1038/ncomms7495), 2015-03-11
Supplement: ncomms7495-s1.pdf [file ncomms7495-s1.pdf]

## Supplementary informations

Supplementary Fig. 1

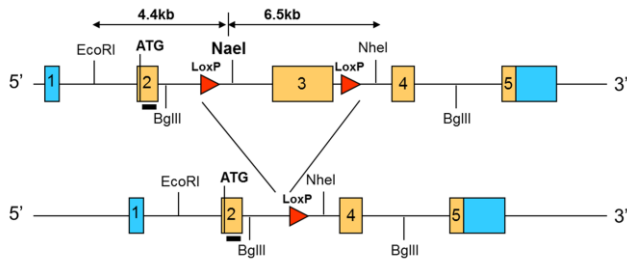

**Schematic view of the *Napepld* *lox/lox* construction.** *Napepld*<sup>*lox/lox*</sup> mice were generated by engineering loxP sites flanking exon 3, which is the most important coding exon.

Supplementary Fig. 2

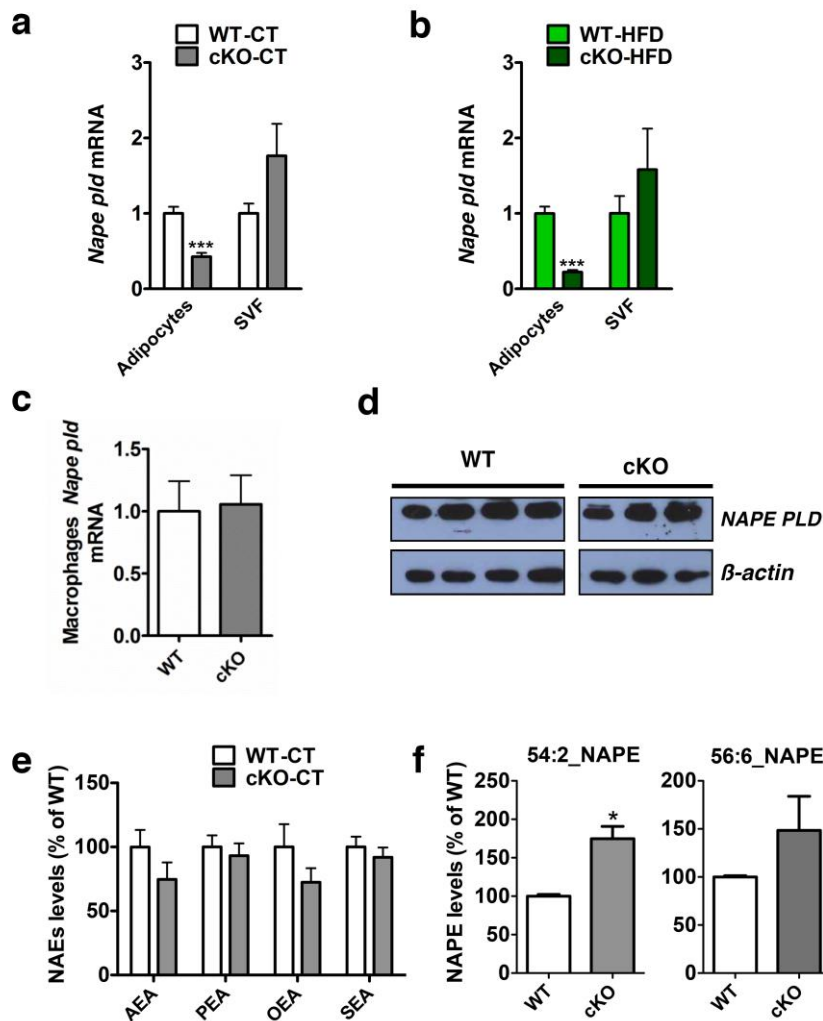

***Nape pld* deletion occurs in adipocytes but not in the stromal vascular fraction.** (a) mRNA expression of *Nape pld* in adipocytes and Stromal vascular fraction (SVF) separated from the SAT depot under CT diet (n=6-10). (b) mRNA expression of *Nape pld* in adipocytes and SVF separated from the SAT depot under HFD (n=6-10). (c) mRNA expression of *Nape pld* in peritoneal isolated primary macrophages. (d) Representative brain immunoblot of NAPE-PLD and  $\beta$ -actin in WT mice and cKO mice. Western blot has been performed on two independent studies on a total of n=10/group. (e) Brain levels of AEA, PEA, OEA and SEA (expressed as a percentage of the wild-type) measured by HPLC-MS (n=5). (f) SAT levels of NAPEs (54:2 and 56:6) (expressed as a percentage of the wild-type) measured by HPLC-MS (n=5). Data are shown as the means  $\pm$  SEM. \* indicates a significant difference ( $P < 0.05$ ), \*\*\* indicates a significant difference ( $P < 0.01$ ) versus WT-CT according to the unpaired two-tailed Student t-test.

### Supplementary Fig. 3

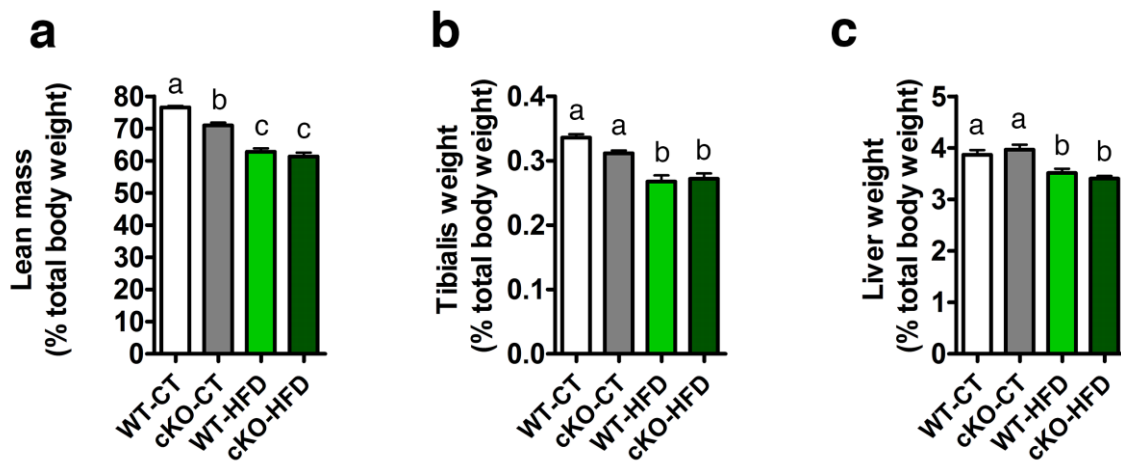

**Adipose tissue *Nape pld* deletion effect on lean mass.** (a) Total lean mass (% of total body weight) measured by TD-NMR (n=20-27). (b) Tibialis muscle weight (% of total body weight) (n=20-27). (c) Liver weight (% of total body weight) (n=20-27). Data are shown as the means  $\pm$  SEM. Data with different superscript letters are significantly different ( $P < 0.05$ ) according to post hoc ANOVA one-way.

**Supplementary Fig. 4**

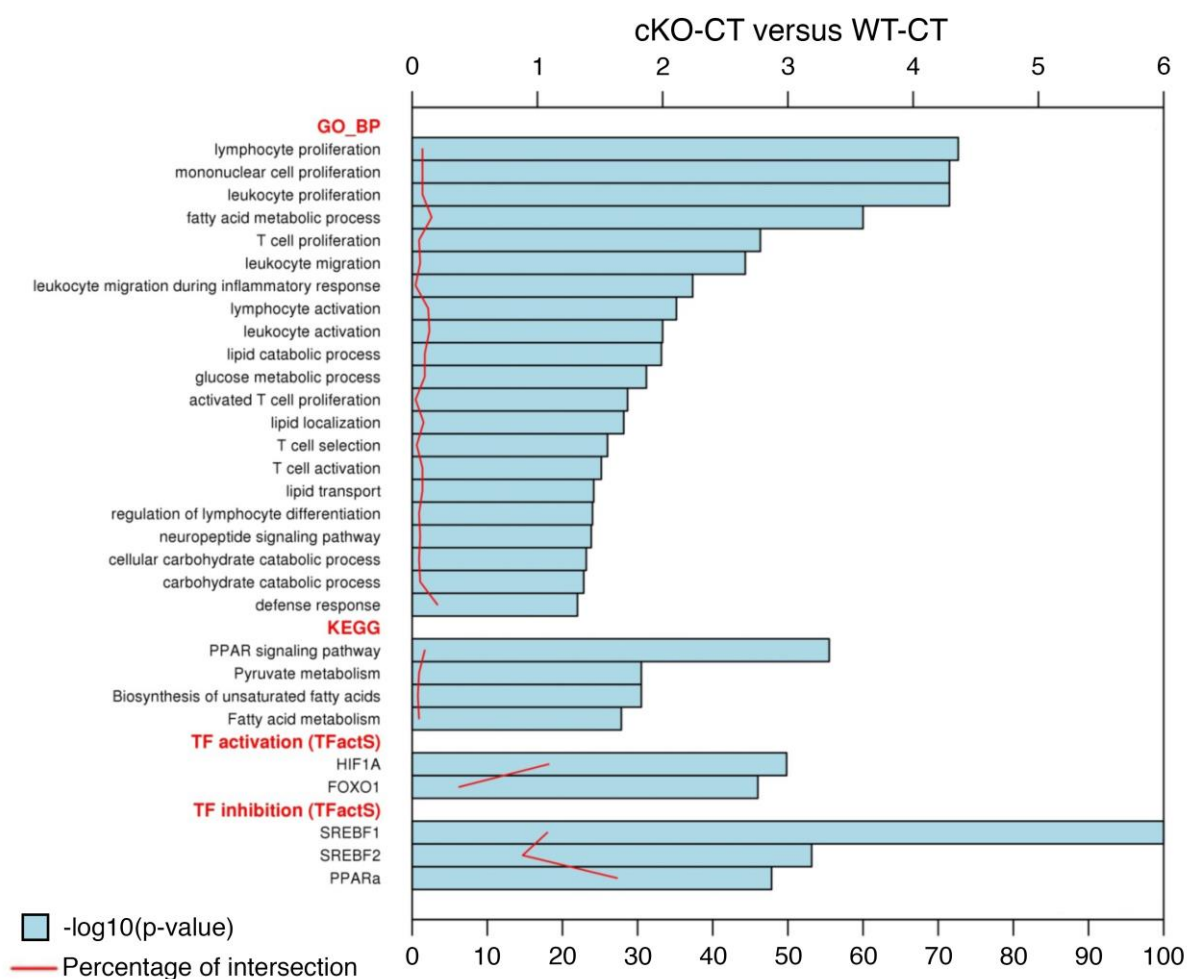

**Microarrays analysis submitted to the bioinformatics tools DAVID and TFactS.** The list of genes that were significantly modified in cKO-CT mice compared to WT-CT mice was submitted to DAVID and to TFactS. For DAVID analysis, the terms represented are terms significantly modified ( $p < 0.05$ ) and selected from the total DAVID analysis based on the list of genes 1,5 fold up- or downregulated in the cKO-CT mice compared to the WT-CT mice. The % of intersection is calculated as the % of genes regulated in cKO-CT mice compared to WT-CT mice on the total target genes of the transcription factor present in the database of TFactS ([www.tfacts.org](http://www.tfacts.org))<sup>1</sup>. The regulation type of transcription factors (activation or inhibition) is indicated if it was found significant ( $P < 0.05$ ) by TFactS (sign-sensitive).

Supplementary Fig. 5

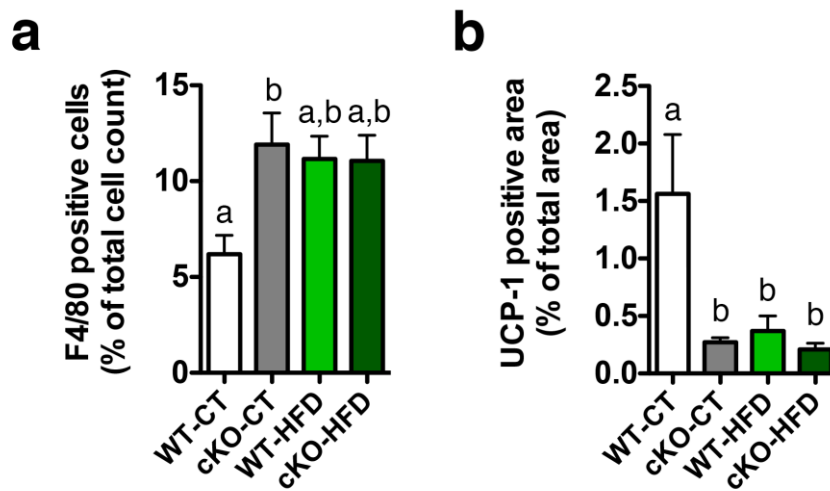

**Adipose tissue *Nape pld* deletion induces macrophage infiltration and decreases browning.** (a) F4/80 positive cell count (n=6-10). (b) UCP1 positive cell count (n=6-10). Data are shown as the means  $\pm$  SEM. Data with different superscript letters are significantly different ( $P < 0.05$ ) according to post hoc ANOVA one-way.

Supplementary Fig. 6

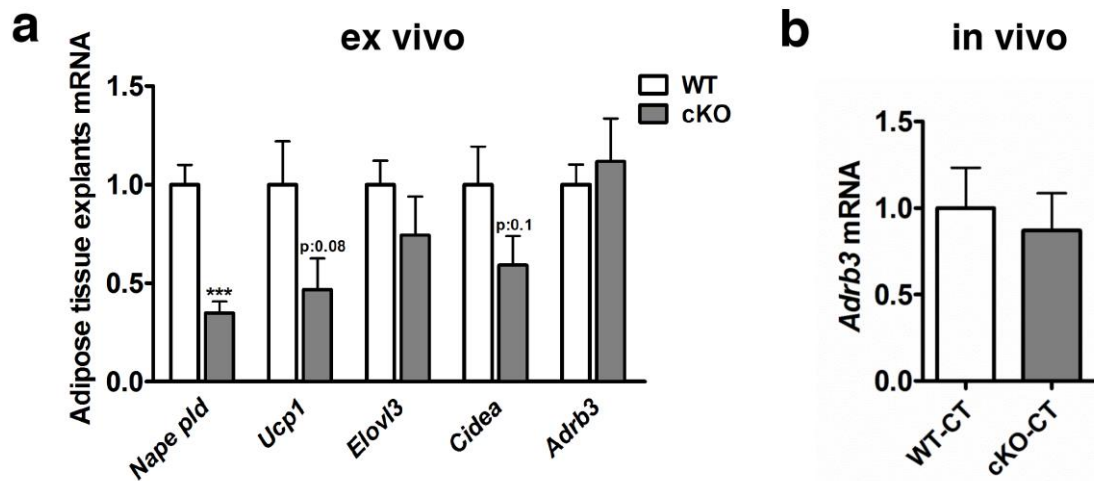

**Browning phenotype is mainly conserved in *ex vivo* explants of adipose tissue's *Nape pld* deleted mice.** (a) mRNA expression of *Nape pld*, *Ucp1*, *Elovl3* and *Cidea* in 24h cultured adipose tissue explants from WT and cKO mice. (b) *Adrb3* mRNA expression in subcutaneous adipose tissue of WT and cKO mice. \*\*\* indicates a significant difference ( $P < 0.01$ ) versus WT-CT according to the unpaired two-tailed Student t-test.

Supplementary Fig. 7

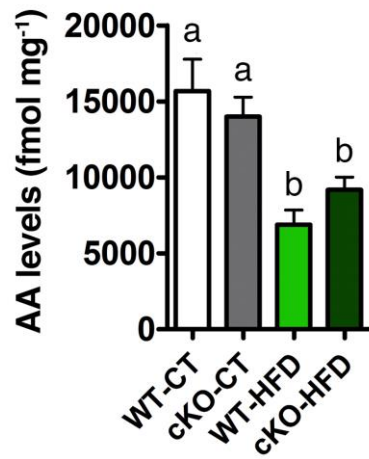

**Adipose tissue *Nape pld* deletion impacts on eicosanoids metabolism.** SAT arachidonic acid (AA) content measured by LC-MS/MS in fmol/mg tissue (n=10). Data are shown as the means  $\pm$  SEM. Data with different superscript letters are significantly different ( $P < 0.05$ ) according to post hoc ANOVA one-way.

Supplementary Fig. 8

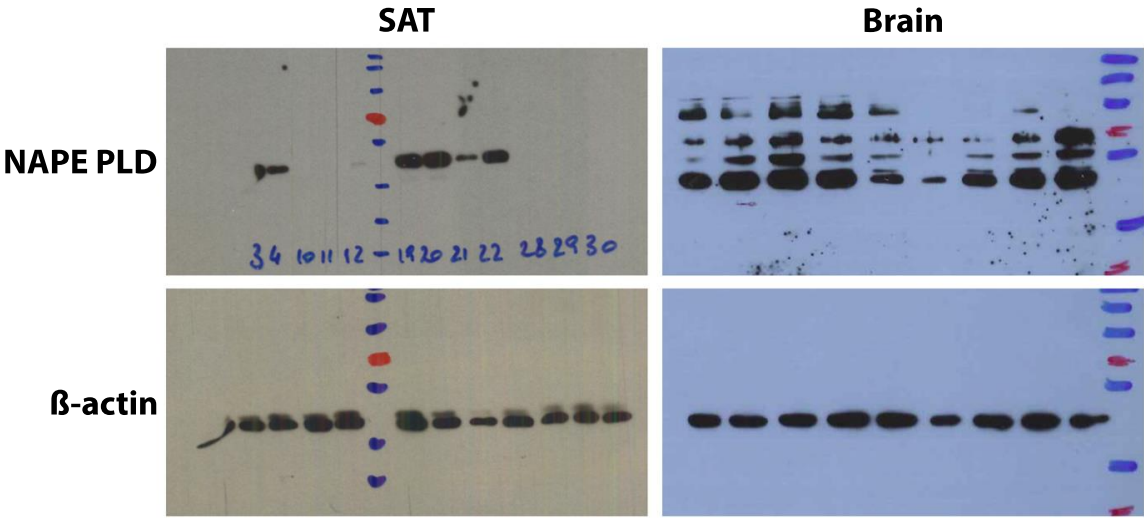

Full and unedited blots for Figure 1 (left) and Supplementary Figure 2 (right). NAPE PLD has size 46 kD, β-Actin has size 43 kD.



## Liver

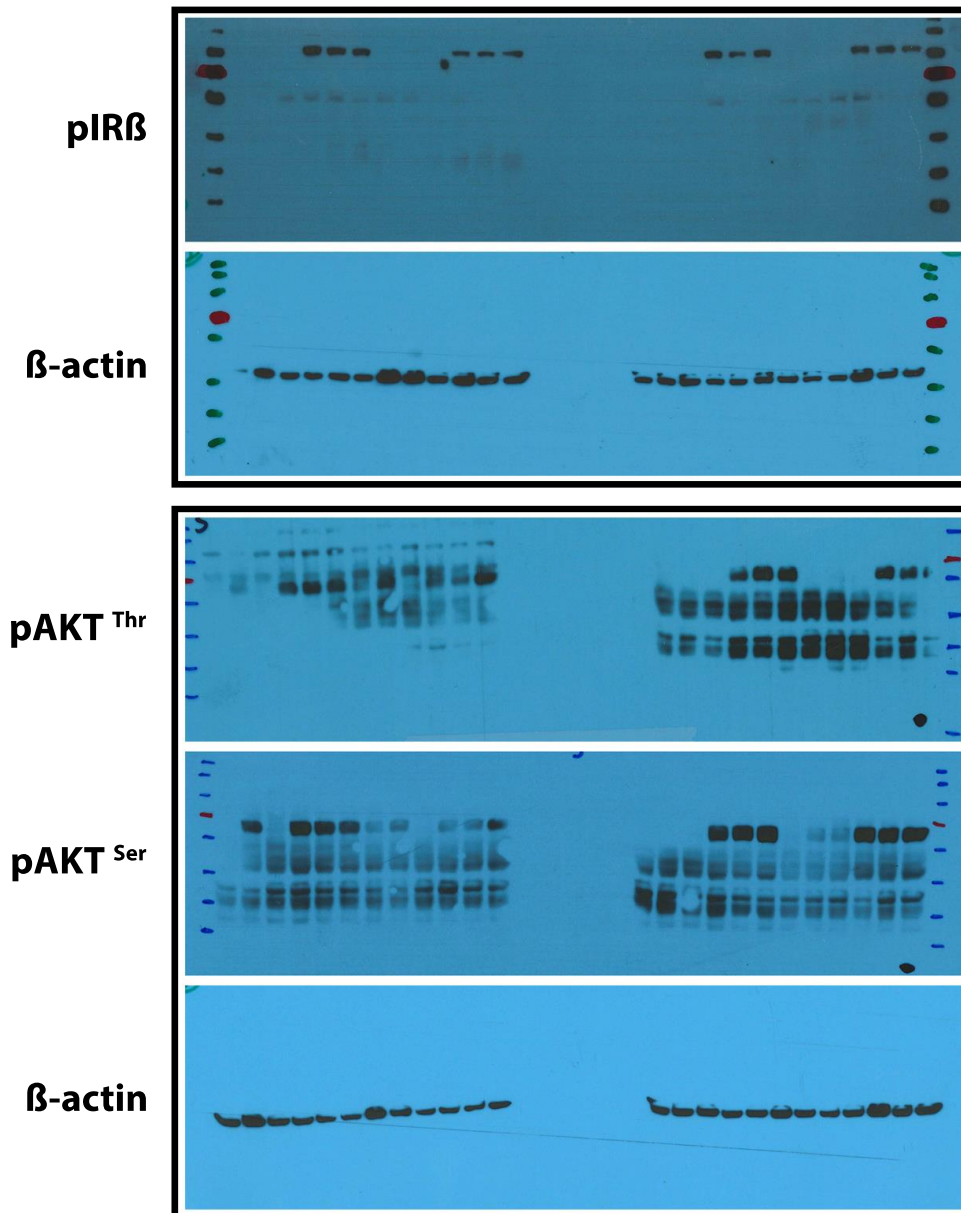

Full and unedited blots for Figure 3 (liver samples). Following molecular weights were predicted: pIRβ: 95 kD, β-actin: 43 kD, pAKT: 60 kD.

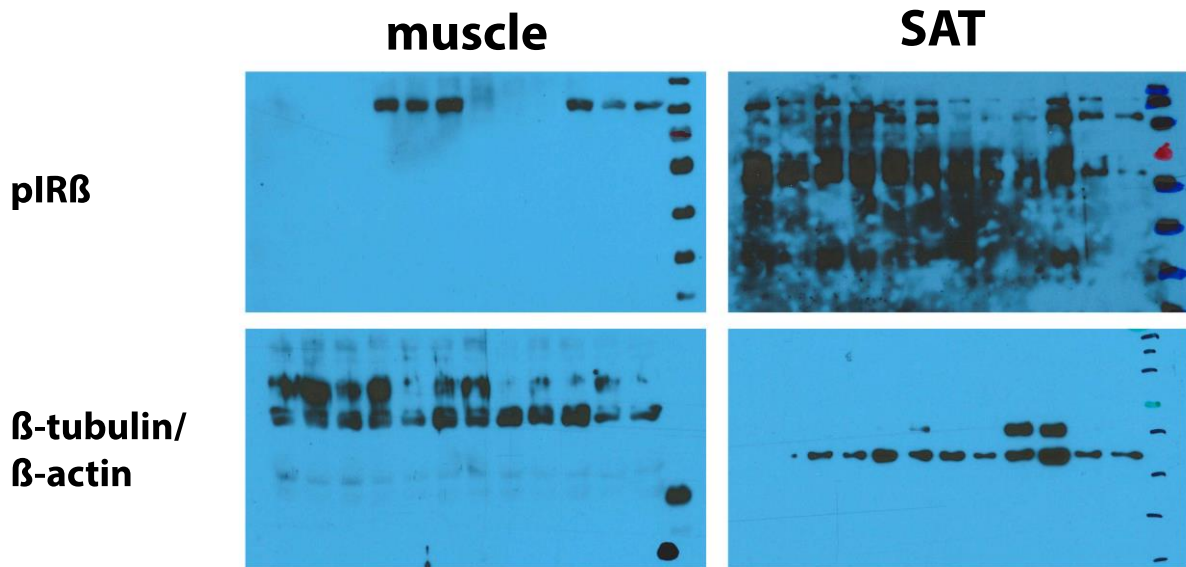

Full and unedited blots for Figure 3 (muscle and subcutaneous adipose tissue samples).

Following molecular weights were predicted: pIRβ: 95 kD, β-actin: 43 kD, β-tubulin: 50 kD.

**Supplementary tables****Supplementary Table 1: Phospholipids analysis in SAT.**

| Phospholipids (pmol/mg ) | WT-CT        | cKO-CT       | WT-HFD       | cKO-HFD      |
|--------------------------|--------------|--------------|--------------|--------------|
| <b>PC aa C36:4</b>       | 100.72±17.49 | 80.1±19.75*  | 36.36±11.53• | 53.94±32.01• |
| <b>PC aa C40:4</b>       | 1.88±0.48    | 1.36±0.48*   | 1.03±0.3*    | 1.46±0.83    |
| <b>PC aa C40:7</b>       | 4.01±0.42    | 3.49±0.47*   | 1.55±0.38•   | 2.49±2.12*   |
| <b>PC ae C32 :0</b>      | 6.15±1.24    | 4.59±0.89*   | 2.43±0.33•   | 2.99±1.03•   |
| <b>PC ae C36 :4</b>      | 3.23±0.8     | 2.21±0.69*   | 1.25±0.4•    | 1.52±0.65•   |
| <b>PC ae C38 :5</b>      | 3.93±1.19    | 2.8±0.85*    | 2.27±0.62•   | 2.89±1.37*   |
| <b>PC ae C40 :5</b>      | 0.71±0.14    | 0.55±0.14*   | 0.38±0.09•   | 0.46±0.24*   |
| <b>LPE a C18 :2</b>      | 0.59±0.17    | 0.44±0.14*   | 0.18±0.05•   | 0.19±0.07•   |
| <b>LPE a C20:4</b>       | 0.33±0.14    | 0.23±0.08*   | 0.1±0.03•    | 0.12±0.04•   |
| <b>PE aa C22:2</b>       | 0.01±0.002   | 0.008±0.002* | 0.005±0.001• | 0.005±0.002• |
| <b>PE aa C40:4</b>       | 4.66±1.53    | 5.94±2.17*   | 4.71±1.09•   | 5.62±2.55*   |
| <b>PE ae C42:1</b>       | 0.83±0.12    | 0.7±0.17*    | 0.42±0.11•   | 0.48±0.21•   |
| <b>SM C16:0</b>          | 126.04±30.91 | 98.48±15.03* | 82.05±5.46•  | 90.48±19.13* |
| <b>SM C16:1</b>          | 5.063±0.75   | 4.39±0.44*   | 4.78±0.56    | 5.00±0.85    |
| <b>SM C17:0</b>          | 1.96±0.29    | 1.63±0.15*   | 2.89±0.34•   | 3.07±0.56•   |
| <b>SM C18:0</b>          | 36.2±7.74    | 28.85±5.25*  | 51.78±4.78•  | 49.75±8.01•  |
| <b>SM C18:1</b>          | 5.82±1.9     | 4.56±0.87*   | 10.97±2.92•  | 9.82±2.15•   |
| <b>SM C20:2</b>          | 0.89±0.32    | 0.64±0.21*   | 0.31±0.04•   | 0.43±0.24•   |
| <b>SM C22:2</b>          | 2.75±1.38    | 1.24±0.7*    | 0.91±0.56*   | 1.59±1.2     |
| <b>SM C24:4</b>          | 1.28±0.44    | 0.78±0.42*   | 0.52±0.34*   | 0.65±0.44*   |

**PC aa:** Phosphatidylcholines with diacyl bonds; **PC ae:** Phosphatidylcholines with acyl/ether bonds; **LPC a or e:** Lysophosphatidylcholines with acyl or ether bonds; **LPE a or e:** lysophosphatidylethanolamines (acyl or ether bond); **PE aa:** Phosphatidylethanolamines with diacyl bonds; **PE ae:** Phosphatidylethanolamines with acyl/ether bonds; **SM:** sphingomyelins.

Phospholipids significantly modified in cKO-CT mice compared to WT-CT mice. Values are expressed in pmol/mg tissue and are obtained from ESI-MS/MS analysis (n=10). Data are shown as the means ± SEM. \* indicates a significant difference ( $P < 0.05$ ) versus WT-CT, • indicates a significant difference ( $P < 0.05$ ) versus WT-CT and cKO-CT according to post hoc ANOVA one-way.

**Supplementary Table 2: Primers sequences**

| <b>Primers</b> | <b>Forward Sequence</b>     | <b>Reverse Sequence</b>    |
|----------------|-----------------------------|----------------------------|
| <i>Acaca</i>   | GTTGAGACGCTGGTTTGTAGAA      | GTCCTTATTATTGTCCCAGACGTA   |
| <i>Acox</i>    | CTATGGGATCAGCCAGAAAG        | AGTCAAAGGCATCCACCAAAG      |
| <i>Acs11</i>   | TGGGGTGGAAATCATCAGCC        | CAC GC TT CA AC GTACA      |
| <i>Adrb3</i>   | CGACATGTTCTCCACAAATCA       | TGGATTCTGCTCTCAAACCTAACC   |
| <i>Cd11c</i>   | ACGTCAGTACAAGGAGATGTTGGA    | ATCCTATTGCAGAATGCTTCTTTACC |
| <i>Cd206</i>   | CCTCTGGTGAACGGAATGAT        | CTTCCTTTGGTCAGCTTTGG       |
| <i>Cd3g</i>    | CCATCTCAAAGGAAACCAAC        | TCTCTACTGGGCTCTCTCCAA      |
| <i>Cd68</i>    | CTTCCCACAGGCAGCACAG         | AATGATGAGAGGCAGCAAGAGG     |
| <i>Cidea</i>   | GCAGCCTGCAGGAACTTATC        | TCATGAAATGCGTGTTGTCC       |
| <i>Elovl3</i>  | TTCTCACGCGGGTTAAAAATG       | GACCAACAGATAGACGACCAC      |
| <i>F4/80</i>   | TGACAACCAGACGGCTTGTG        | GCAGGCGAGGAAAAGATAGTGT     |
| <i>Fasn</i>    | TTCCAAGACGAAAATGATGC        | AATTGTGGGATCAGGAGAGC       |
| <i>Il1b</i>    | TCGCTCAGGGTCACAAGAAA        | CATCAGAGGCCAAGGAGGAAAAC    |
| <i>Lbp</i>     | GTCCTGGGAATCTGTCCTTG        | CCGGTAACCTTGCTGTTGTT       |
| <i>MCPI</i>    | GCAGTTAACGCCCCACTCA         | CCCAGCCTACTCATTGGGATCA     |
| <i>Napepld</i> | TTCTTTGCTGGGGATACTGG        | GCAAGGTCAAAGGACCAAA        |
| <i>PAII</i>    | ACAGCCTTTGTCATCTCAGCC       | CCGACACAAAGAAGGA           |
| <i>PPARa</i>   | CAACGGCGTCGAAGACAAA         | TGACGGTCTCCACGGACAT        |
| <i>Pparg1a</i> | AGCCGTGACCACTGACAACGAG      | GCTGCATGGTTCTGAGTGCTAAG    |
| <i>Prdm16</i>  | TCAGGAAGGGGAAGGAGAGA        | ACGGCTTCTCTTTGTTGTGC       |
| <i>RPL19</i>   | GAAGGTCAAAGGGAATGTGTTCA     | CCTTGTCTGCCTTCAGCTTGT      |
| <i>Ucp1</i>    | GCT ACA CGG GGA CCT ACA ATG | CGTCATCTGCCAGTATTTTGTT     |

**Supplementary Table 3: Phyla enriched or depleted in cKO-CT mice compared to WT-CT mice.**

| <b>Phyla</b>          | <b>WT-CT</b> |            | <b>cKO-CT</b> |            | <b>cKO-CT vs WT-CT</b> |                    |
|-----------------------|--------------|------------|---------------|------------|------------------------|--------------------|
|                       | <b>Mean</b>  | <b>SEM</b> | <b>Mean</b>   | <b>SEM</b> | <b>p-value</b>         | <b>Changes (%)</b> |
| <b>Actinobacteria</b> | 0,56         | 0,23       | 0,04          | 0,01       | 0,01                   | <b>-91,98</b>      |
| <b>Proteobacteria</b> | 7,71         | 0,45       | 5,88          | 0,36       | 0,007                  | <b>-23,69</b>      |
| <b>Unclassified</b>   | 3            | 0,33       | 5,28          | 0,56       | 0,01                   | <b>76,11</b>       |

Data are shown as the means and SEM. Only significant differences ( $P < 0.05$ ) between the two groups are indicated. P values are based on the 2-sample *t*-test assuming equal variances. Student *t*-test results were corrected by an FDR test according to the Benjamini-Hochberg procedure, with an  $\alpha$  of  $< 0.05$ . No significant p-values after FDR correction.

**Supplementary Table 4: Families enriched or depleted in cKO-CT mice compared to WT-CT mice.**

| <b>Families</b>                   | <b>WT-CT</b> |            | <b>cKO-CT</b> |            | <b>cKO-CT vs WT-CT</b> |                    |
|-----------------------------------|--------------|------------|---------------|------------|------------------------|--------------------|
|                                   | <b>Mean</b>  | <b>SEM</b> | <b>Mean</b>   | <b>SEM</b> | <b>p-value</b>         | <b>Changes (%)</b> |
| <i>Alcaligenaceae</i>             | 2,88         | 0,93       | 0,52          | 0,14       | 0,006                  | <b>-81,94</b>      |
| <i>Bacteroidaceae</i>             | 2,86         | 0,4        | 1,17          | 0,12       | 0,0002*                | <b>-59,02</b>      |
| <i>Clostridiaceae</i>             | 0,01         | 0,01       | 0,09          | 0,03       | 0,04                   | <b>933,89</b>      |
| <i>Coriobacteriaceae</i>          | 0,56         | 0,23       | 0,04          | 0,02       | 0,01                   | <b>-92,15</b>      |
| <i>Erysipelotrichaceae</i>        | 9,35         | 3,04       | 2,8           | 0,41       | 0,01                   | <b>-70,06</b>      |
| <i>Lactobacillaceae</i>           | 0,12         | 0,04       | 0,02          | 0,01       | 0,006                  | <b>-85,09</b>      |
| <i>unclassified_Bacteria</i>      | 3            | 0,33       | 5,28          | 0,56       | 0,01                   | <b>76,11</b>       |
| <i>unclassified_Clostridia</i>    | 0,34         | 0,06       | 0,84          | 0,16       | 0,04                   | <b>144,41</b>      |
| <i>unclassified_Clostridiales</i> | 7,17         | 0,77       | 9,19          | 0,57       | 0,05                   | <b>28,15</b>       |

Data are shown as the means and SEM. Only significant differences ( $P < 0.05$ ) between the two groups are indicated. P values are based on the 2-sample *t*-test assuming equal variances. \* Student *t*-test results were corrected by an FDR test according to the Benjamini-Hochberg procedure, with an  $\alpha$  of  $< 0.05$ . \*: significant p-values after FDR correction.

**Supplementary Table 5: Genera enriched or depleted in cKO-CT mice compared to WT-CT mice.**

| <b>Genera</b>          | <b>WT-CT</b> |            | <b>cKO-CT</b> |            | <b>cKO-CT vs WT-CT</b> |                    |
|------------------------|--------------|------------|---------------|------------|------------------------|--------------------|
|                        | <b>Mean</b>  | <b>SEM</b> | <b>Mean</b>   | <b>SEM</b> | <b>p-value</b>         | <b>Changes (%)</b> |
| <i>Allobaculum</i>     | 7,61         | 2,47       | 2,3           | 0,34       | 0,01                   | <b>-69,72</b>      |
| <i>Bacteroides</i>     | 2,86         | 0,4        | 1,17          | 0,12       | 0,0002*                | <b>-59,02</b>      |
| <i>Clostridium</i>     | 0,01         | 0,01       | 0,09          | 0,03       | 0,04                   | <b>925,01</b>      |
| <i>Lactobacillus</i>   | 0,12         | 0,04       | 0,02          | 0,01       | 0,006                  | <b>-85,09</b>      |
| <i>Odoribacter</i>     | 2,63         | 0,45       | 4,48          | 0,37       | 0,008                  | <b>70,65</b>       |
| <i>Olsenella</i>       | 0,45         | 0,21       | 0             | 0          | 0,01                   | <b>-99,65</b>      |
| <i>Parabacteroides</i> | 0,67         | 0,15       | 0,33          | 0,07       | 0,03                   | <b>-50,78</b>      |
| <i>Parasutterella</i>  | 2,88         | 0,93       | 0,52          | 0,14       | 0,006                  | <b>-81,94</b>      |
| <i>unclassified</i>    | 6,88         | 0,86       | 4,51          | 0,22       | 0,005                  | <b>-34,51</b>      |

Data are shown as the means and SEM. Only significant differences ( $P < 0.05$ ) between the two groups are indicated. P values are based on the 2-sample *t*-test assuming equal variances.

\* Student *t*-test results were corrected by an FDR test according to the Benjamini-Hochberg procedure, with an  $\alpha$  of  $< 0.05$ . \*: significant p-values after FDR correction.
